# Supplementary material for: Health-Related Quality of Life Subdomains in Patients with Parkinson’s Disease: The Role of Gender
Source: Hindawi journal article supplement (doi:10.1155/2018/6532320), 2018-08-01
Supplement: f1 [file 6532320.f1.pdf]

**Supplementary Material**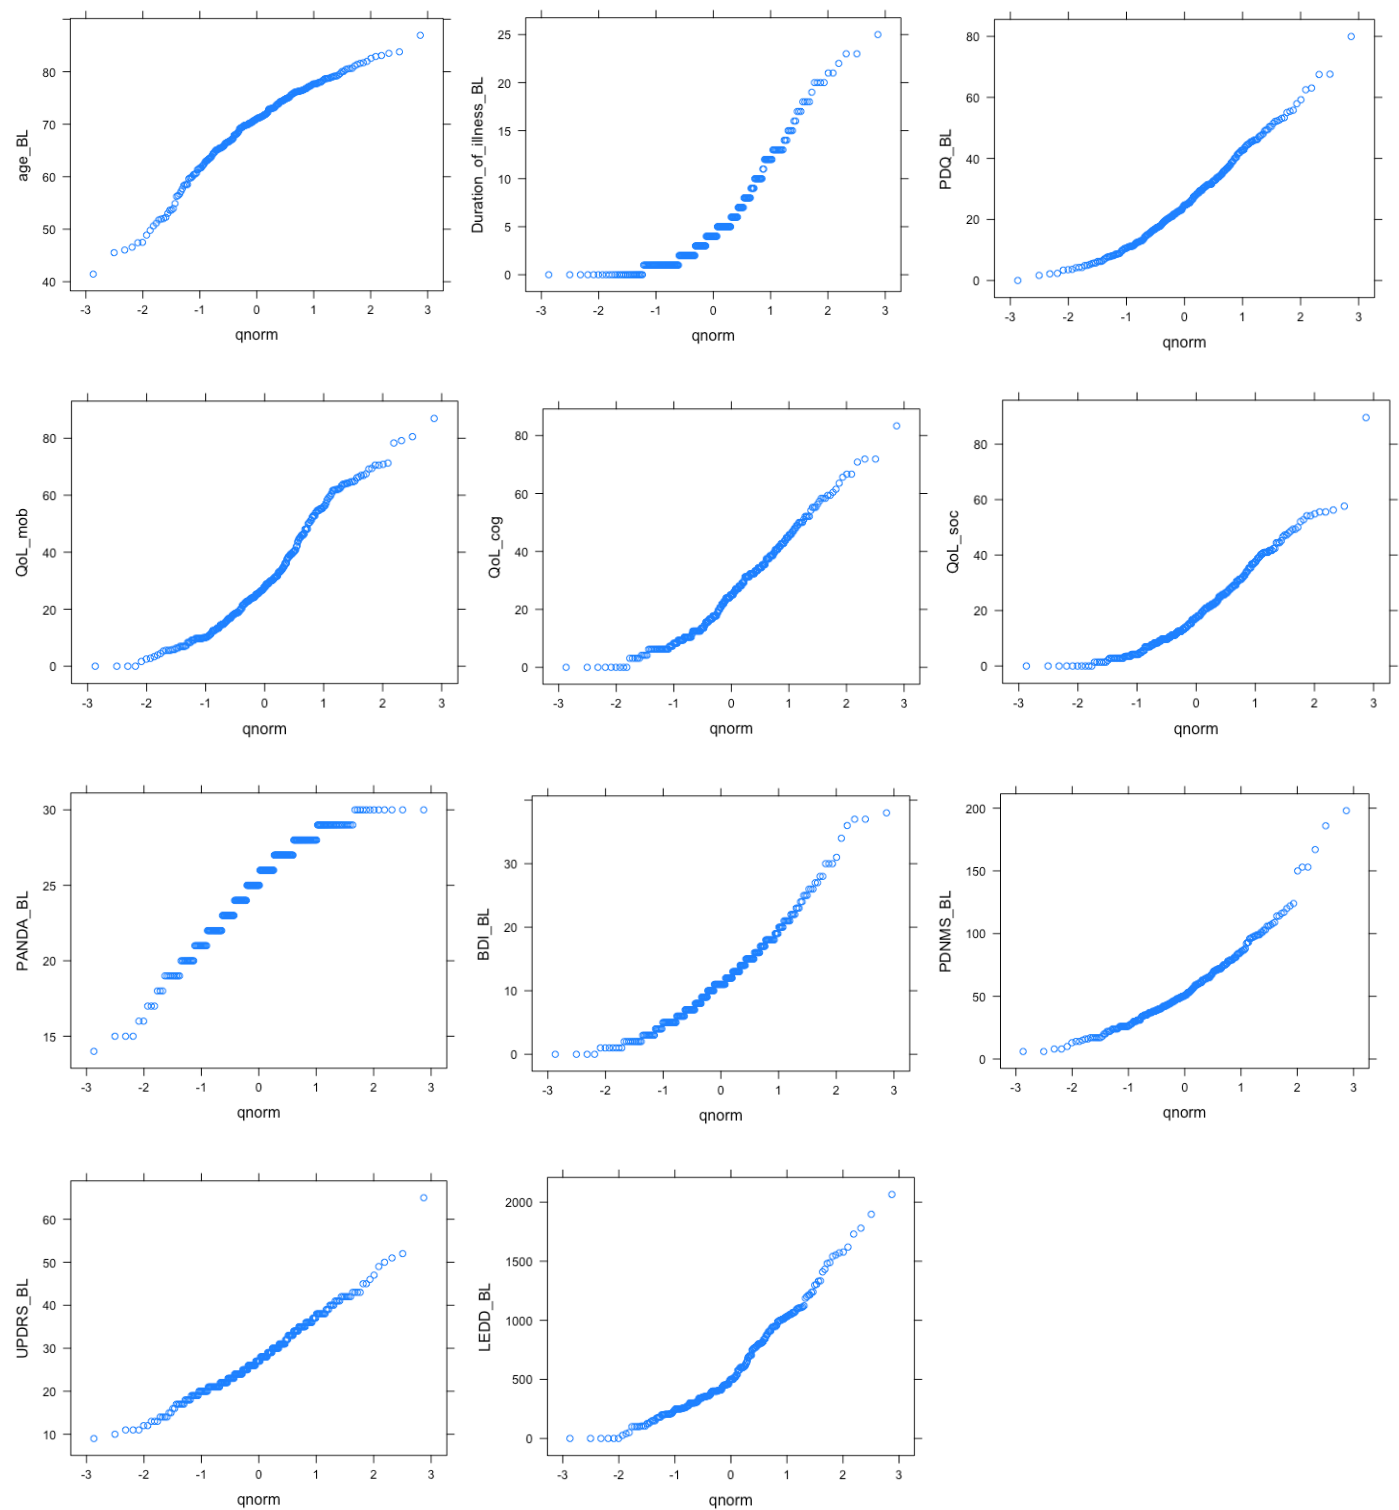

Figure S1. Q-Q plots for the normality tests of all variables used in the study.

Table S2

*Summary of the Factor Analysis on Parkinson's Disease Questionnaire 39 Dimensions: Pattern Matrix (N = 245) after Oblique Promax Rotation*

| PDQ-39 Dimension           | Promax Rotated Factor Loadings |             |             | $h^2$       |
|----------------------------|--------------------------------|-------------|-------------|-------------|
|                            | Component 1                    | Component 2 | Component 3 |             |
| Bodily Discomfort          | <b>.98</b>                     | -.17        | -.10        | .71         |
| Mobility                   | <b>.80</b>                     | .12         | .03         | .80         |
| Activities of Daily Living | <b>.54</b>                     | .45         | -.09        | .70         |
| Communication              | -.13                           | <b>.96</b>  | .04         | .83         |
| Cognitive Impairment       | .10                            | <b>.77</b>  | .00         | .69         |
| Emotional Well-Being       | .45                            | .07         | <b>.46</b>  | .71         |
| Stigma                     | -.26                           | .18         | <b>.89</b>  | .73         |
| Social Support             | .19                            | -.20        | <b>.79</b>  | .67         |
| Eigenvalue                 | 2.27                           | 1.91        | 1.67        |             |
| % Variance Explained       | 28                             | 24          | 21          | $\Sigma$ 73 |
| Cronbach's $\alpha$        | .81                            | .76         | .72         |             |

*Note.* Factor loadings > .45 appear in bold.  $h^2$  = communality. PDQ-39 = Parkinson's Disease Questionnaire 39.

Table S3

*Structure Matrix of the Factor Analysis on Parkinson's Disease Questionnaire 39 Dimensions (N = 245) after Oblique Promax Rotation*

| PDQ-39 Dimension           | (Pattern Matrix) * (Correlation Matrix of Factors) |             |             |
|----------------------------|----------------------------------------------------|-------------|-------------|
|                            | Component 1                                        | Component 2 | Component 3 |
| Bodily Discomfort          | <b>.83</b>                                         | .36         | .34         |
| Mobility                   | <b>.88</b>                                         | <b>.60</b>  | <b>.50</b>  |
| Activities of Daily Living | <b>.76</b>                                         | <b>.73</b>  | .39         |
| Communication              | <b>.46</b>                                         | <b>.91</b>  | .40         |
| Cognitive Impairment       | <b>.56</b>                                         | <b>.83</b>  | .40         |
| Emotional Well-Being       | <b>.73</b>                                         | <b>.54</b>  | <b>.73</b>  |
| Stigma                     | .31                                                | .42         | <b>.83</b>  |
| Social Support             | <b>.48</b>                                         | .26         | <b>.80</b>  |

*Note.* Factor loadings > .45 appear in bold. PDQ-39 = Parkinson's Disease Questionnaire 39.
